# Supplementary material
Source: PubMed Central journal article supplement (PMC2801269)
Supplement: supp_M109.058909_jbc.M109.058909-1.pdf [file supp_M109.058909_jbc.M109.058909-1.pdf]

## **Supplementary Figure legends**

### **Suppl. Figure 1**

OsRac1  $^1\text{H}$ - $^{15}\text{N}$  HSQC spectra.

Pairs of overlying OsRac1 spectra of OsRac1 are shown. Left, OsRac1 alone (red) and in the presence of the wild-type OsRbohB<sup>138-313</sup> (blue). Right, OsRac1 alone (red) and in the presence of the R273Q/Y277Q mutant of OsRbohB<sup>138-313</sup> (blue).

### **Suppl. Figure 2**

The highly conserved N-terminal cytoplasmic regions of Rboh proteins.

Sequence alignment of Rboh proteins from *Oryza sativa* (OsRbohB, A, C, and D), *Arabidopsis thaliana* (AtRbohC, D, and F), *Solanum tuberosum* (StRbohA and B), *Nicotiana benthamiana* (NbRbohA and B), and *Nicotiana tabacum* (NtRbohD). Identical and homologous residues are shown on yellow and blue background, respectively. EF-hand motifs are indicated above the alignment.

### **Suppl. Figure 3**

Model for the regulation of RbohB in rice innate immunity

The N-terminal cytoplasmic region takes part in an intramolecular interaction with the cytosolic C-terminal region that carries FAD- and NADPH-binding domains. The Rac1 immune complex is composed of several proteins. Rboh probably dimerizes through interaction of the cytoplasmic domains and is regulated by this dimerization and by  $\text{Ca}^{2+}$ .

### Supplementary Table 1

#### Structure validation by MolProbity

|                                             |                          |
|---------------------------------------------|--------------------------|
| clash score, all atoms (percentile)*        | 20.3 (63 <sup>rd</sup> ) |
| Rotamer outliers (%)                        | 12.2                     |
| C $\beta$ deviations > 0.25 Å               | 0                        |
| MolProbity score <sup>^</sup> (percentile)* | 2.9 (35 <sup>th</sup> )  |
| Residues with bad bonds (%)                 | 0.0                      |
| Residues with bad angles (%)                | 0.0                      |

\* 100<sup>th</sup> percentile is the best of comparable resolution; 0<sup>th</sup> percentile is the worst.

<sup>^</sup>MolProbity score is defined as the following:  $0.42574 * \log(1 + \text{clashscore}) + 0.32996 * \log(1 + \max(0, \text{pctRotOut} - 1)) + 0.24979 * \log(1 + \max(0, 100 - \text{pctRamaFavored} - 2)) + 0.5$

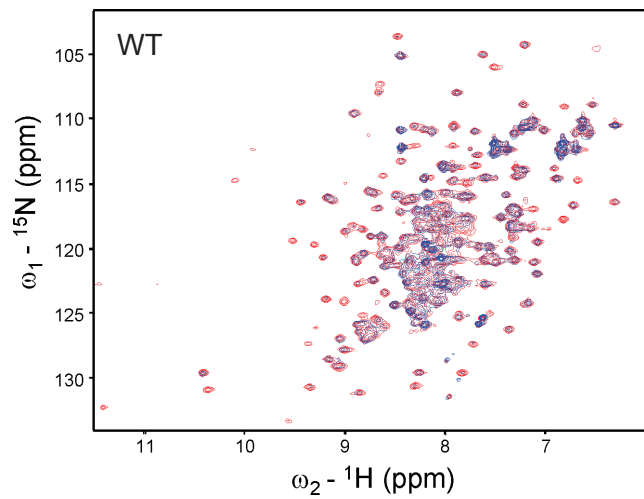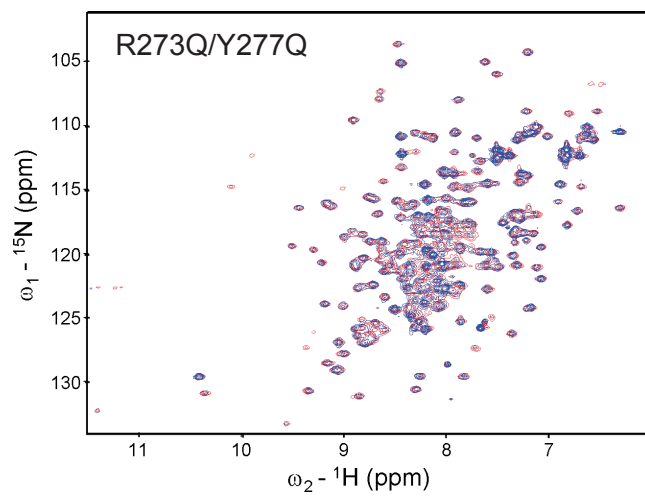

Supplementary figure.1 (Oda *et al.*)

|              | 138 | 140 | 150 |   | 180 |   | EF-like1 |   | x | y | z | -y | -x | -z |   |   |   |   |   |   |   |   |   |   |   |   |   |   |   |   |   |   |   |   |   |   |   |   |   |   |   |   |   |   |   |   |   |   |   |     |     |     |
|--------------|-----|-----|-----|---|-----|---|----------|---|---|---|---|----|----|----|---|---|---|---|---|---|---|---|---|---|---|---|---|---|---|---|---|---|---|---|---|---|---|---|---|---|---|---|---|---|---|---|---|---|---|-----|-----|-----|
| OsRbohB      | T   | K   | S   | S | A   | A | V        | A | L | K | G | L  | Q  | F  | V | T | - | A | K | V | G | N | - | D | G | W | A | A | V | E | K | R | F | N | Q | L | Q | V | D | - | - | G | V | L | L | R | S | R | F | G   | K   | 184 |
| OsRbohA      | T   | R   | S   | G | A   | H | K        | A | L | R | G | L  | R  | F  | I | S | - | S | N | K | A | N | - | N | A | W | M | E | V | Q | A | N | F | D | R | L | A | R | D | - | - | G | Y | L | S | R | S | D | F | A   | E   | 213 |
| OsRbohC      | T   | K   | S   | G | A   | Q | R        | A | I | R | G | L  | R  | F  | I | S | G | P | N | K | A | S | - | N | A | W | I | E | V | Q | A | N | F | D | R | L | A | R | D | - | - | G | Y | L | S | R | D | D | F | P   | Q   | 221 |
| OsRbohD      | T   | H   | S   | S | A   | Q | P        | A | L | R | G | L  | R  | F  | L | D | K | T | S | A | G | K | - | D | G | W | K | N | V | E | K | R | F | D | E | M | S | - | A | D | - | G | R | L | P | Q | E | S | F | A   | K   | 98  |
| AtRbohC/RHD2 | T   | K   | S   | A | A   | S | Q        | A | L | K | G | L  | K  | F  | I | S | - | K | T | D | G | G | - | A | G | W | S | A | V | E | K | R | F | N | Q | I | T | A | T | T | G | L | L | L | R | T | K | F | G | E   | 182 |     |
| AtRbohD      | T   | S   | S   | A | A   | I | H        | A | L | K | G | L  | K  | F  | I | A | - | T | K | T | - | - | - | A | A | W | P | A | V | D | Q | R | F | D | K | L | S | A | D | S | N | G | L | L | L | S | A | K | F | W   | E   | 207 |
| AtRbohF      | T   | R   | S   | S | A   | Q | R        | A | L | R | G | L  | R  | F  | I | S | - | N | K | Q | K | N | V | D | G | W | N | D | V | Q | S | N | F | E | K | F | E | K | N | - | - | G | Y | I | Y | R | S | D | F | A   | Q   | 219 |
| StRbohA      | T   | R   | S   | S | A   | H | K        | A | L | R | G | L  | K  | F  | I | S | - | N | N | K | - | - | T | N | G | W | N | E | V | E | N | N | F | S | K | L | A | K | D | - | - | G | Y | L | Y | R | S | D | F | A   | Q   | 231 |
| StRbohB      | S   | K   | S   | G | A   | R | A        | L | R | G | L | Q  | F  | M  | N | - | K | N | V | G | T | - | E | G | W | S | E | V | E | S | R | F | D | Q | L | A | V | N | - | - | G | M | L | T | K | S | L | F | G | Q   | 153 |     |
| NbRbohA      | T   | R   | S   | S | A   | H | R        | A | L | R | G | L  | K  | F  | I | S | - | N | N | K | - | - | T | N | G | W | N | E | V | E | N | N | F | S | K | L | A | K | D | - | - | G | Y | L | Y | R | S | D | F | A   | Q   | 229 |
| NbRbohB      | N   | K   | S   | A | A   | H | A        | L | K | G | L | K  | F  | I  | S | - | K | T | D | G | G | - | A | G | W | P | A | V | E | K | R | F | D | E | I | T | A | S | T | T | G | L | L | P | R | A | K | F | G | E   | 199 |     |
| NtRbohD      | N   | K   | S   | A | A   | H | A        | L | K | G | L | K  | F  | I  | S | - | K | T | D | G | G | - | A | G | W | A | V | E | K | R | F | D | E | I | T | A | S | T | T | G | L | L | P | R | A | K | F | G | E | 199 |     |     |

|              | 190 |   | 200 |   | 210 |   | EF-like2 |   | x | y | z | -y | -x | -z | 220 |   | 230 |   |   |   |   |   |   |   |   |   |   |   |   |   |   |   |   |   |   |   |   |   |   |   |   |   |   |   |   |   |   |   |   |   |   |     |
|--------------|-----|---|-----|---|-----|---|----------|---|---|---|---|----|----|----|-----|---|-----|---|---|---|---|---|---|---|---|---|---|---|---|---|---|---|---|---|---|---|---|---|---|---|---|---|---|---|---|---|---|---|---|---|---|-----|
| OsRbohB      | C   | I | G   | M | D   | - | G        | S | D | E | F | A  | V  | Q  | M   | F | D   | S | L | A | R | K | R | G | I | V | K | Q | V | - | L | T | K | D | E | L | K | D | F | Y | E | Q | L | T | D | Q | G | F | D | N | R | 233 |
| OsRbohA      | C   | I | G   | M | -   | T | E        | S | K | E | F | A  | L  | E  | L   | F | D   | T | L | S | R | R | R | Q | M | K | V | D | T | - | I | N | K | D | E | L | R | E | I | W | Q | Q | I | T | D | N | S | F | D | S | R | 262 |
| OsRbohC      | C   | I | G   | M | -   | T | E        | S | K | E | F | A  | M  | E  | L   | F | D   | T | L | S | R | R | R | Q | M | Q | V | D | K | - | I | N | K | E | E | L | R | E | I | W | Q | Q | I | T | D | N | S | F | D | S | R | 270 |
| OsRbohD      | C   | I | G   | M | -   | A | D        | S | K | E | F | A  | S  | E  | V   | F | V   | A | L | A | R | R | R | S | I | K | P | E | D | G | I | T | K | E | Q | L | K | E | F | W | E | E | L | T | D | Q | N | F | D | S | R | 148 |
| AtRbohC/RHD2 | C   | I | G   | M | T   | - | -        | S | K | D | F | A  | L  | E  | L   | F | D   | A | L | A | R | R | R | N | I | T | G | E | V | - | I | D | G | D | Q | L | K | E | F | W | E | Q | I | N | D | Q | S | F | D | S | R | 230 |
| AtRbohD      | C   | L | G   | M | N   | K | E        | S | K | D | F | A  | D  | Q  | L   | F | R   | A | L | A | R | R | N | N | V | S | G | D | A | - | I | T | K | E | Q | L | R | I | F | W | E | Q | I | S | D | E | S | F | D | A | K | 256 |
| AtRbohF      | C   | I | G   | M | -   | K | D        | S | K | E | F | A  | L  | E  | L   | F | D   | A | L | S | R | R | R | R | L | K | V | E | K | - | I | N | H | D | E | L | Y | E | Y | W | S | Q | I | N | D | E | S | F | D | S | R | 280 |
| StRbohA      | C   | I | G   | M | -   | K | D        | S | K | E | F | A  | L  | E  | L   | F | D   | A | L | S | R | R | R | R | L | K | V | E | K | - | I | S | K | E | E | L | Y | E | Y | W | S | Q | I | T | D | Q | S | F | D | S | R | 268 |
| StRbohB      | C   | I | G   | M | -   | K | E        | S | S | E | F | A  | E  | E  | L   | F | D   | A | L | A | R | K | R | C | I | T | S | P | A | - | V | T | K | D | E | L | R | E | F | W | E | Q | I | T | D | T | S | F | D | A | R | 202 |
| NbRbohA      | C   | I | G   | M | -   | K | D        | S | K | E | F | A  | L  | E  | L   | F | D   | A | L | S | R | R | R | R | L | K | V | D | K | - | I | S | K | E | E | L | Y | E | Y | W | S | Q | I | T | D | Q | S | F | D | S | R | 279 |
| NbRbohB      | C   | I | G   | M | N   | K | E        | S | K | E | F | A  | V  | E  | L   | Y | D   | A | L | A | R | R | R | N | I | T | T | D | S | - | I | N | K | A | Q | L | K | E | F | W | D | Q | V | A | D | Q | S | F | D | S | R | 250 |
| NtRbohD      | C   | I | G   | M | N   | K | E        | S | K | E | F | A  | V  | E  | L   | Y | D   | A | L | A | R | R | R | N | I | T | T | D | S | - | I | N | K | A | Q | L | K | E | F | W | D | Q | V | A | D | Q | S | F | D | S | R | 249 |

|              | EF-1 |   | x | y | z | -y | -x | -z | 240 |   | 250 |   | 260 |   | 270 |   | 280 |   |   |   |   |   |   |   |   |   |   |   |   |   |   |   |   |   |   |   |   |   |   |   |   |   |   |   |   |   |   |   |   |   |     |     |
|--------------|------|---|---|---|---|----|----|----|-----|---|-----|---|-----|---|-----|---|-----|---|---|---|---|---|---|---|---|---|---|---|---|---|---|---|---|---|---|---|---|---|---|---|---|---|---|---|---|---|---|---|---|---|-----|-----|
| OsRbohB      | L    | R | T | F | F | D  | M  | V  | D   | K | N   | A | D   | G | R   | L | T   | A | E | E | V | K | E | I | I | A | L | S | A | S | A | N | K | L | S | K | I | K | E | R | A | D | E | Y | T | A | L | I | M | E | E   | 284 |
| OsRbohA      | L    | Q | I | F | F | E  | M  | V  | D   | K | N   | A | D   | G | R   | I | T   | E | A | E | V | K | E | I | I | M | L | S | A | S | A | N | K | L | S | R | L | K | E | Q | A | E | E | Y | A | A | L | I | M | E | E   | 313 |
| OsRbohC      | L    | Q | I | F | F | D  | M  | V  | D   | K | N   | A | D   | G | H   | I | T   | E | A | E | V | K | E | I | I | M | L | S | A | S | A | N | K | L | S | R | L | K | E | Q | A | E | E | Y | A | A | L | I | M | E | N   | 321 |
| OsRbohD      | L    | R | I | F | F | D  | M  | C  | D   | K | N   | A | D   | G | Q   | L | T   | E | D | E | V | K | E | V | I | V | L | S | A | A | A | N | K | L | A | K | L | K | S | H | A | A | T | Y | A | S | L | I | M | E | E   | 199 |
| AtRbohC/RHD2 | L    | K | T | F | F | D  | M  | V  | D   | K | D   | A | D   | G | R   | L | T   | E | D | E | V | R | E | I | I | S | L | S | A | S | A | N | K | L | S | T | I | Q | K | R | A | D | E | Y | A | A | L | I | M | E | E   | 281 |
| AtRbohD      | L    | Q | V | F | F | D  | M  | V  | D   | K | D   | E | D   | G | R   | V | T   | E | E | E | V | A | E | I | I | S | L | S | A | S | A | N | K | L | S | N | I | Q | K | Q | A | K | E | Y | A | A | L | I | M | E | E   | 308 |
| AtRbohF      | L    | Q | I | F | F | D  | I  | V  | D   | K | N   | E | D   | G | R   | I | T   | E | E | E | V | K | E | I | I | M | L | S | A | S | A | N | K | L | S | R | L | K | E | Q | A | E | E | Y | A | A | L | I | M | E | E   | 319 |
| StRbohA      | L    | Q | I | F | F | D  | M  | V  | D   | K | N   | E | D   | G | R   | I | G   | E | E | E | V | K | E | I | I | M | L | S | A | S | A | N | K | L | S | R | L | K | E | Q | A | E | E | Y | A | A | L | I | M | E | E   | 331 |
| StRbohB      | L    | Q | T | F | F | D  | M  | V  | D   | K | D   | A | D   | G | R   | I | T   | Q | E | E | V | K | E | I | I | S | L | S | A | S | A | N | K | L | S | K | I | Q | D | N | S | D | E | Y | A | A | L | I | M | E | E   | 253 |
| NbRbohA      | L    | Q | I | F | F | D  | M  | V  | D   | K | N   | E | D   | G | Q   | I | A   | E | E | E | V | K | E | I | I | M | L | S | A | S | A | N | K | L | S | R | L | K | E | Q | A | E | E | Y | A | A | L | I | M | E | E   | 330 |
| NbRbohB      | L    | Q | T | F | F | D  | M  | V  | D   | K | D   | A | D   | G | R   | I | T   | E | E | E | V | R | E | I | I | G | L | S | A | S | A | N | R | L | S | T | I | Q | K | Q | A | D | E | Y | A | A | M | I | M | E | E   | 301 |
| NtRbohD      | L    | Q | T | F | F | D  | M  | V  | D   | K | D   | A | D   | G | R   | I | T   | E | E | V | R | E | I | I | G | L | S | A | S | A | N | R | L | S | T | I | Q | K | Q | A | D | E | Y | A | A | M | I | M | E | E | 300 |     |

|              | EF-2 |   | x | y | z | -y | -x | -z | 290 |   | 300 |   | 310 |   |   |   |   |   |   |   |   |   |   |   |   |   |   |   |   |     |
|--------------|------|---|---|---|---|----|----|----|-----|---|-----|---|-----|---|---|---|---|---|---|---|---|---|---|---|---|---|---|---|---|-----|
| OsRbohB      | L    | D | P | T | N | L  | G  | Y  | I   | E | M   | E | D   | L | E | A | L | L | L | Q | S | P | S | E | A | A | A | R | S | 313 |
| OsRbohA      | L    | D | P | E | G | L  | G  | Y  | I   | E | L   | W | Q   | L | E | T | L | L | L | Q | K | D | T | Y | M | N | Y | S | Q | 342 |
| OsRbohC      | L    | N | P | E | Q | L  | G  | Y  | I   | E | L   | W | Q   | L | E | T | L | L | L | Q | K | D | T | Y | V | N | Y | S | Q | 350 |
| OsRbohD      | L    | D | P | D | H | R  | G  | Y  | I   | E | I   | W | Q   | L | E | T | L | L | R | G | M | V | T | A | Q | G | P | P | E | 228 |
| AtRbohC/RHD2 | L    | D | P | D | N | I  | G  | Y  | I   | M | L   | E | S   | L | E | T | L | L | L | Q | A | A | T | Q | S | V | I | T | S | 310 |
| AtRbohD      | L    | D | P | D | N | A  | G  | F  | I   | M | I   | E | N   | L | E | M | L | L | L | Q | A | P | N | Q | S | V | R | - | M | 336 |
| AtRbohF      | L    | D | P | E | R | L  | G  | Y  | I   | E | L   | W | Q   | L | E | T | L | L | L | Q | K | D | T | Y | L | N | Y | S | Q | 348 |
| StRbohA      | L    | D | P | E | R | L  | G  | Y  | I   | E | L   | W | Q   | L | E | T | L | L | L | Q | K | D | T | Y | L | N | Y | S | Q | 360 |
| StRbohB      | L    | D |   |   |   |    |    |    |     |   |     |   |     |   |   |   |   |   |   |   |   |   |   |   |   |   |   |   |   |     |

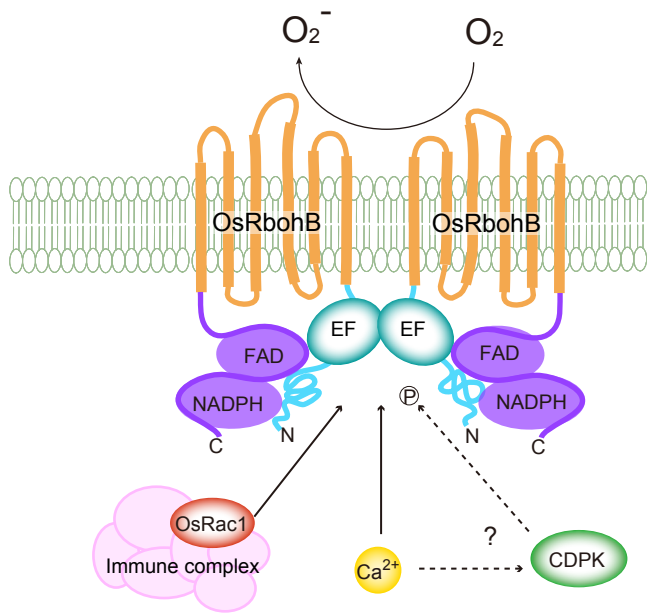

Supplementary figure.3 (Oda *et al.*)
